# Supplementary material for: Variants in ASPH cause exertional heat illness and are associated with malignant hyperthermia susceptibility
Source: PubMed Central journal article supplement (PMC9192596; doi:10.1038/s41467-022-31088-8), 2022-06-13
Supplement: 41467_2022_31088_MOESM1_ESM.pdf [file 41467_2022_31088_MOESM1_ESM.pdf]

**Supplementary Table 1: Genes associated with EC-coupling**

| <b>Protein</b>                                                          | <b>Gene Name</b> | <b>NCBI Gene ID</b> |
|-------------------------------------------------------------------------|------------------|---------------------|
| junctionin                                                              | <i>ASPH</i>      | 444                 |
| ATPase sarcoplasmic/endoplasmic reticulum Ca <sup>2+</sup> transporting | <i>ATP2A1</i>    | 487                 |
| ATPase sarcoplasmic/endoplasmic reticulum Ca <sup>2+</sup> transporting | <i>ATP2A2</i>    | 488                 |
| ATPase plasma membrane Ca <sup>2+</sup> transporting 3                  | <i>ATP2B3</i>    | 492                 |
| calcium voltage-gated channel subunit alpha1 S                          | <i>CACNA1S</i>   | 779                 |
| calcium voltage-gated channel auxiliary subunit alpha2delta 1           | <i>CACNA2D1</i>  | 781                 |
| calcium voltage-gated channel auxiliary subunit beta 1                  | <i>CACNB1</i>    | 782                 |
| calcium voltage-gated channel auxiliary subunit gamma 1                 | <i>CACNG1</i>    | 786                 |
| calmodulin 1                                                            | <i>CALM1</i>     | 801                 |
| calcium/calmodulin dependent protein kinase II alpha                    | <i>CAMK2A</i>    | 815                 |
| calcium/calmodulin dependent protein kinase II beta                     | <i>CAMK2B</i>    | 816                 |
| calcium/calmodulin dependent protein kinase II delta                    | <i>CAMK2D</i>    | 817                 |
| calcium/calmodulin dependent protein kinase II gamma                    | <i>CAMK2G</i>    | 818                 |
| calsequestrin 1                                                         | <i>CASQ1</i>     | 844                 |
| calsequestrin 2                                                         | <i>CASQ2</i>     | 845                 |
| FKBP12                                                                  | <i>FKBP1A</i>    | 2280                |
| junctionophilin 1                                                       | <i>JPH1</i>      | 56704               |
| junctionophilin 2                                                       | <i>JPH2</i>      | 57158               |
| junctional sarcoplasmic reticulum protein 1                             | <i>JSRP1</i>     | 126306              |
| ryanodine receptor 1                                                    | <i>RYR1</i>      | 6261                |
| SH3 and cysteine rich domain 3                                          | <i>STAC3</i>     | 246329              |
| triadin                                                                 | <i>TRDN</i>      | 10345               |

**Supplementary Table 2: Identified variants in Canadian MH cohort**

| source | chr | start     | end       | ref_al<br>lele | alt_all<br>ele | var_type | typeseq               | gene_sym<br>bol | ExAC<br>_freq | sift_score | polyphen<br>_score | CADD<br>_phred |
|--------|-----|-----------|-----------|----------------|----------------|----------|-----------------------|-----------------|---------------|------------|--------------------|----------------|
| WGS    | 1   | 116247812 | 116247812 | C              | G              | snp      | intronic;<br>splicing | CASQ2           | 0             | NA         | NA                 | 27.6           |
| WGS    | 1   | 160171036 | 160171036 | C              | T              | snp      | exonic                | CASQ1           | 1.00E-04      | 0.046      | 0.991              | 24.2           |
|        |     |           |           | AGTA<br>GCTC   |                |          |                       |                 |               |            |                    |                |
| WES    | 1   | 201009083 | 201009091 | T              | A              | del      | exonic                | CACNA1S         | 0.0017        | NA         | NA                 | 42             |
| WGS    | 1   | 201012542 | 201012542 | C              | T              | snp      | exonic                | CACNA1S         | 8.24E-06      | 0.012      | 0.118              | 27             |
| WES    | 1   | 201022387 | 201022387 | C              | T              | snp      | exonic                | CACNA1S         | 0.0017        | 0.002      | 0.99               | 34             |
| WES    | 1   | 201046058 | 201046058 | C              | T              | snp      | exonic                | CACNA1S         | 0.0088        | 0.002      | 0.859              | 26.8           |
| WES    | 1   | 201046058 | 201046058 | C              | T              | snp      | exonic                | CACNA1S         | 0.0088        | 0.002      | 0.859              | 26.8           |
| WES    | 1   | 201058513 | 201058513 | C              | T              | snp      | exonic                | CACNA1S         | 0.0074        | 0.096      | 0.938              | 23.2           |
| WES    | 1   | 201058513 | 201058513 | C              | T              | snp      | exonic                | CACNA1S         | 0.0074        | 0.096      | 0.938              | 23.2           |
| WES    | 1   | 201058513 | 201058513 | C              | T              | snp      | exonic                | CACNA1S         | 0.0074        | 0.096      | 0.938              | 23.2           |
| WES    | 7   | 81601108  | 81601108  | C              | T              | snp      | exonic                | CACNA2D1        | 0.0027        | 0.266      | 0.005              | 17.75          |
| WGS    | 8   | 62577998  | 62577998  | C              | G              | snp      | exonic                | ASPH            | 0             | 0.004      | 0.824              | 20.2           |
| WES    | 8   | 62596603  | 62596603  | A              | G              | snp      | exonic                | ASPH            | 9.91E-05      | 0.046      | 0.998              | 29.2           |
| WES    | 8   | 62596603  | 62596603  | A              | G              | snp      | exonic                | ASPH            | 9.91E-05      | 0.046      | 0.998              | 29.2           |
| WES    | 12  | 110783861 | 110783861 | G              | A              | snp      | exonic                | ATP2A2          | 9.88E-05      | 0.127      | 0.064              | 20.5           |
| WES    | 12  | 110784210 | 110784210 | A              | G              | snp      | exonic;<br>intronic   | ATP2A2          | 0.001         | 0.619      | 0.001              | NA             |
| WES    | 12  | 110784210 | 110784210 | A              | G              | snp      | exonic;<br>intronic   | ATP2A2          | 0.001         | 0.619      | 0.001              | NA             |
| WGS    | 16  | 28906222  | 28906222  | A              | G              | snp      | exonic                | ATP2A1          | 3.00E-04      | 0.177      | 0.001              | 17.08          |
| WES    | 17  | 37342222  | 37342222  | C              | T              | snp      | exonic;<br>intronic   | CACNB1          | 2.57E-05      | 0.001      | 0.535              | 18.7           |
| WES    | 19  | 2252525   | 2252525   | G              | A              | snp      | exonic                | JSRP1           | 0.0012        | 0.289      | 0.51               | 22.4           |
| WES    | 19  | 38934255  | 38934255  | C              | T              | snp      | exonic                | RYR1            | 8.27E-06      | 0          | 1                  | 27.4           |
| WES    | 19  | 38939352  | 38939352  | G              | A              | snp      | exonic                | RYR1            | 0             | 0          | 0.992              | 32             |
| WGS    | 19  | 38946145  | 38946145  | A              | T              | snp      | exonic                | RYR1            | 0             | 0          | 1                  | 27.9           |
| WGS    | 19  | 38948193  | 38948193  | C              | A              | snp      | exonic                | RYR1            | 0             | 0.002      | 0.973              | 29.4           |
| WES    | 19  | 38948227  | 38948227  | C              | T              | snp      | exonic                | RYR1            | 2.47E-05      | 0          | 0.999              | 35             |
| WES    | 19  | 38956907  | 38956907  | G              | A              | snp      | exonic                | RYR1            | 4.53E-05      | 0.023      | 0.992              | 28.9           |
| WES    | 19  | 38956907  | 38956907  | G              | A              | snp      | exonic                | RYR1            | 4.53E-05      | 0.023      | 0.992              | 28.9           |
| WES    | 19  | 38957032  | 38957032  | G              | A              | snp      | exonic                | RYR1            | 0             | 0.051      | 0.736              | 22.7           |
| WES    | 19  | 38958397  | 38958397  | G              | A              | snp      | exonic                | RYR1            | 0.0017        | 0.593      | 0.717              | 18.06          |
| WES    | 19  | 38965975  | 38965975  | A              | G              | snp      | exonic                | RYR1            | 0.0051        | 0.34       | 0.202              | 22.5           |
| WES    | 19  | 38968434  | 38968434  | G              | A              | snp      | exonic                | RYR1            | 8.27E-06      | 0.27       | 0.998              | 24.4           |
| WES    | 19  | 38976331  | 38976331  | G              | A              | snp      | exonic                | RYR1            | 0.0015        | 0.079      | 0.999              | 25.8           |
| WES    | 19  | 38976331  | 38976331  | G              | A              | snp      | exonic                | RYR1            | 0.0015        | 0.079      | 0.999              | 25.8           |
| WGS    | 19  | 38985205  | 38985205  | G              | A              | snp      | exonic                | RYR1            | 0             | 0          | 0.998              | 30             |
| WGS    | 19  | 38989863  | 38989863  | G              | A              | snp      | exonic                | RYR1            | 0             | 0.001      | 0.994              | 24.9           |
| WGS    | 19  | 38989863  | 38989863  | G              | A              | snp      | exonic                | RYR1            | 0             | 0.001      | 0.994              | 24.9           |
| WES    | 19  | 38989881  | 38989881  | A              | G              | snp      | exonic                | RYR1            | 0.0011        | 0.053      | 0.98               | 18.13          |
| WES    | 19  | 38989881  | 38989881  | A              | G              | snp      | exonic                | RYR1            | 0.0011        | 0.053      | 0.98               | 18.13          |
| WGS    | 19  | 38990633  | 38990633  | G              | A              | snp      | exonic                | RYR1            | 2.48E-05      | 0          | 1                  | 23.8           |
| WES    | 19  | 38993528  | 38993528  | G              | A              | snp      | exonic                | RYR1            | 8.37E-05      | 0.099      | 0.994              | 26.6           |
| WGS    | 19  | 38993564  | 38993564  | T              | G              | snp      | exonic                | RYR1            | 0             | 0.001      | 0.994              | 23.5           |
| WGS    | 19  | 38995404  | 38995404  | T              | G              | snp      | exonic                | RYR1            | 0             | 0          | 0.997              | 24.2           |
| WGS    | 19  | 38995404  | 38995404  | T              | G              | snp      | exonic                | RYR1            | 0             | 0          | 0.997              | 24.2           |
| WES    | 19  | 38996015  | 38996015  | C              | T              | snp      | exonic                | RYR1            | 1.98E-05      | 0.046      | 0.995              | 24.5           |
| WGS    | 19  | 39002913  | 39002913  | G              | A              | snp      | exonic                | RYR1            | 6.00E-04      | 0.001      | 0.998              | 23.5           |
| WGS    | 19  | 39009877  | 39009877  | C              | T              | snp      | exonic                | RYR1            | 7.48E-05      | 0.003      | 0.796              | 25.6           |
| WES    | 19  | 39068824  | 39068824  | G              | A              | snp      | exonic                | RYR1            | 5.32E-05      | 0          | 1                  | 27.9           |
| WES    | 20  | 42788571  | 42788571  | T              | C              | snp      | exonic                | JPH2            | 0.0013        | 0.003      | 0.449              | 24.2           |

**Supplementary Table 3. Clinical information**

| Cohort              | Canada                                                                        |                                                                               | UK                                                                                                                                                          |                                                                                                             | Canada                                                        |                                                 |                                                 | UK                                              |                                                                                                                                                                                                                     |
|---------------------|-------------------------------------------------------------------------------|-------------------------------------------------------------------------------|-------------------------------------------------------------------------------------------------------------------------------------------------------------|-------------------------------------------------------------------------------------------------------------|---------------------------------------------------------------|-------------------------------------------------|-------------------------------------------------|-------------------------------------------------|---------------------------------------------------------------------------------------------------------------------------------------------------------------------------------------------------------------------|
|                     | Proband                                                                       | Proband's sister                                                              | Proband                                                                                                                                                     | Proband's sister                                                                                            | Proband                                                       | Proband's sister                                | Proband's son                                   | Proband's niece                                 | Proband                                                                                                                                                                                                             |
| Mutation in ASPH    | p.Val54Ala heterozygous                                                       | p.Val54Ala heterozygous                                                       | p.Lys88Thr heterozygous                                                                                                                                     |                                                                                                             | p.Asp149His heterozygous + (clinical grading scale score: 43) | N/A                                             | N/A                                             | No mutation in ASPH                             | p.Lys202Arg heterozygous                                                                                                                                                                                            |
| MH episode          | -                                                                             | -                                                                             | -                                                                                                                                                           | -                                                                                                           | -                                                             | -                                               | -                                               | -                                               | -                                                                                                                                                                                                                   |
| EHS episode         | -                                                                             | -                                                                             | 1 episode: collapse & loss of consciousness during training on deployment (non-temperate region). Diagnosed with heat stroke - hospital records unavailable | -                                                                                                           | -                                                             | -                                               | -                                               | -                                               | At least 2 episodes of heat illness involving dizziness, visual disturbance, unsteady gait during military training runs in the UK. Responded to active cooling in the field. No reliable core temperature reading. |
| Muscle symptoms     | Muscle cramps, twitches, spasm and stiffness, worsened with heat and exercise | Muscle cramps, twitches, spasm and stiffness, worsened with heat and exercise | none                                                                                                                                                        | Severe muscle cramps and twitches all over his body, extensive muscle pain affecting his functional ability | Nothing                                                       | Nothing                                         | Very mild muscle cramps                         | Nothing                                         | none                                                                                                                                                                                                                |
| Heat sensitivity    | Muscle symptoms worsened with heat and exercise                               | Muscle symptoms worsened with heat and exercise                               | none                                                                                                                                                        | Muscle symptoms worsened with heat, excessive sweating                                                      | Nothing                                                       | Nothing                                         | Nothing                                         | Nothing                                         | With exercise                                                                                                                                                                                                       |
| CK                  | High (500-1000 IU/L)                                                          | N/A                                                                           | normal                                                                                                                                                      | 200-300 IU/L                                                                                                | Normal                                                        | Normal                                          | Normal                                          | Normal                                          | normal                                                                                                                                                                                                              |
| Histopathology      | Normal                                                                        | Normal                                                                        | normal                                                                                                                                                      | Normal                                                                                                      | Normal                                                        | Normal                                          | Normal                                          | Normal                                          | normal                                                                                                                                                                                                              |
| Contracture test    | MHShc by CHCT (caffeine: 0.4*, halothane: 1.4**)                              | MHShc by CHCT (caffeine: 0.8*, halothane: 1.0**)                              | MHN by IVCT laboratory classification (halothane 0.05, caffeine 0)                                                                                          | MHShc by CHCT (caffeine: 0.6*, halothane: 4.0**)                                                            | MHShc by CHCT (caffeine: 0.1, halothane: 1.4**)               | MHShc by CHCT (caffeine: 0.1, halothane: 1.4**) | MHShc by CHCT (caffeine: 0.2, halothane: 1.8**) | MHShc by CHCT (caffeine: 0.2, halothane: 1.8**) | MHN by IVCT laboratory classification (halothane 0.1, caffeine 0)                                                                                                                                                   |
| Heat tolerance test | Not performed                                                                 | Not performed                                                                 | Failed on 2 occasions                                                                                                                                       | Not performed                                                                                               | Not performed                                                 | Not performed                                   | Not performed                                   | Not performed                                   | Failed on 2 occasions                                                                                                                                                                                               |
| Therapy             | Oral dantrolene with favorable results                                        | Oral dantrolene with favorable results                                        | Discharged from military service                                                                                                                            | Oral dantrolene responded partially                                                                         | Oral dantrolene responded partially                           | Oral dantrolene responded partially             | Oral dantrolene responded partially             | Oral dantrolene responded partially             | Discharged from military service                                                                                                                                                                                    |

The threshold responses for a positive diagnosis in CHCT were \*caffeine>0.3 and/or \*\*halothane>0.7.  
The threshold for a positive diagnosis in IVCT were 0.2 g force produced at 2 mM caffeine and/or at 2%.

**Supplementary Table 4. Numbers of myotubes analyzed in Figure 3a**

| Caffeine (mM) | 0.3 | 0.7 | 1  | 3  | 10 | 30 |
|---------------|-----|-----|----|----|----|----|
| Tg-WT         | 26  | 7   | 6  | 7  | 3  | 3  |
| Tg-V54A       | 35  | 10  | 10 | 9  | 3  | 3  |
| Tg-K88T       | 51  | 11  | 12 | 13 | 7  | 8  |

**Supplementary Figure 1: Transcript isoforms of *ASPH*.** Data Source: GTEx Analysis Release V8 (dbGaP Accession phs000424.v8.p2)

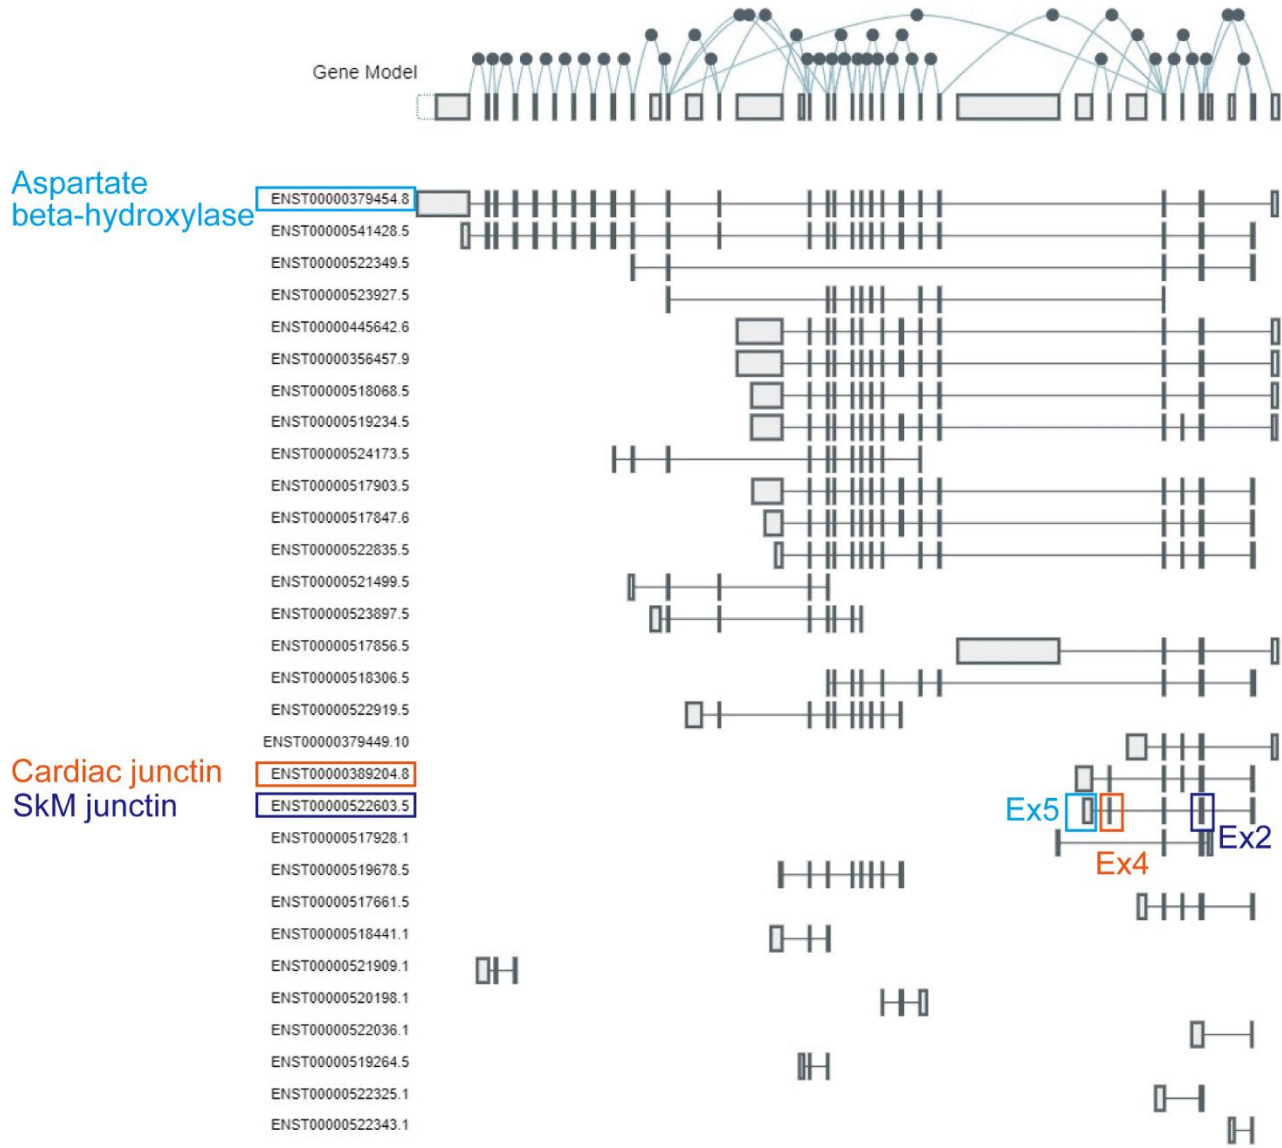

## Supplementary Figure 2: The location of variants identified in Junctin protein.

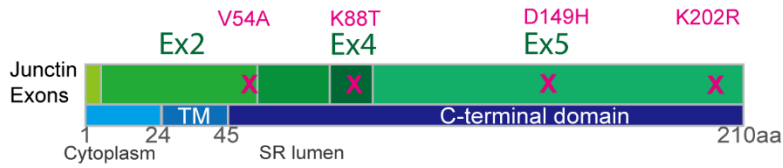

### Protein-sequence conservation

|                        |                                                                                                                  |              |                                                                                                                 |
|------------------------|------------------------------------------------------------------------------------------------------------------|--------------|-----------------------------------------------------------------------------------------------------------------|
| <b>V54A</b>            | VVWFDLVDYEE <b>A</b> LGKLGIIYDADGD                                                                               | <b>K88T</b>  | DAKVLEGPSPGVA <b>R</b> RTKAKVKELTKEELKKEKEK                                                                     |
| Homo sapiens           | VVWFDLVDYEEV <b>L</b> LGKLGIIYDADGD                                                                              |              | DAKVLEGPSPGVA <b>KRRTKAKVKELTKEELKKEKEK</b>                                                                     |
| Canis lupus familiaris | VVWFDLVDYEEV <b>L</b> LGKLG <b>V</b> YDADGD                                                                      |              | DAKVLEGP <b>GGVAKRRTKAKVKELTKEELKKEKEK</b>                                                                      |
| Rattus norvegicus      | VVWFDLVDYEEV <b>L</b> LGKLG <b>V</b> YDADGD                                                                      |              | DAKVLEGP <b>GGLAKRRTKAKVKEPTKEELKKEKEK</b>                                                                      |
| Mus musculus           | VVWFDLVDYEEV <b>L</b> LGKLG <b>V</b> YDADGD                                                                      |              | DAKVLEGP <b>GGLAKRRTKAKAKEPIKEELKKEK<b>RGK</b></b>                                                              |
| Danio rerio            | VV <b>Y</b> FDLVDY <b>QGVIAK</b> -----                                                                           |              | ----- <b>EKEAKAKPKL</b> -----LNK <b>F</b> DK <b>T</b>                                                           |
|                        |                                                                                                                  |              | <b>KEKE-motif</b>                                                                                               |
| <b>D149H</b>           | LSRK <b>E</b> SPKG <b>K</b> <b>H</b> REKEKVDLEKSA                                                                | <b>K202R</b> | KESRSSTRYAHL <b>T</b> QNTQKRNG                                                                                  |
| Homo sapiens           | LSRK <b>E</b> SPKG <b>K</b> <b>D</b> REKEKVDLEKSA                                                                |              | KESRSSTRYAHL <b>T</b> KGNTQKRNG                                                                                 |
| Canis lupus familiaris | <b>I</b> SRK <b>E</b> SPKG <b>K</b> <b>D</b> REKE <b>N</b> VGLDKSA                                               |              | <b>K</b> EG <b>K</b> T <b>S</b> SK <b>H</b> TH <b>S</b> AK <b>G</b> NNQ <b>K</b> R <b>N</b>                     |
| Rattus norvegicus      | <b>I</b> S <b>Q</b> K <b>A</b> SP <b>G</b> G <b>K</b> <b>R</b> DR <b>A</b> KE <b>K</b> AS <b>S</b> DK <b>S</b> G |              | <b>R</b> K <b>G</b> R <b>G</b> SS <b>S</b> SH <b>A</b> P <b>V</b> T <b>K</b> EN <b>S</b> Q <b>K</b> RR <b>N</b> |
| Mus musculus           | <b>T</b> S <b>Q</b> K <b>A</b> SA <b>A</b> G <b>K</b> <b>R</b> DR <b>D</b> KE <b>K</b> AS <b>S</b> DK <b>S</b> S |              | -- <b>G</b> R <b>S</b> SS <b>G</b> H <b>A</b> H <b>V</b> A <b>K</b> EN <b>G</b> Q <b>K</b> RR <b>N</b>          |
| Danio rerio            | <b>K</b> T <b>I</b> K <b>S</b> E <b>I</b> NS <b>A</b> K <b>L</b> RR <b>K</b> K <b>G</b> K <b>V</b> E             |              | -----                                                                                                           |

**Supplementary Figure 3: mRNA levels of mCherry-junctin in Tg-fish.** Three technical replicates of each sample and four independent replicates were analyzed statistically by one-way ANOVA followed by Dunnett's multiple comparisons test. Error bars represent mean  $\pm$  SEM. Differences were considered to be statistically significant at  $P < 0.05$  (\*). Source data are provided as a Source Data file.

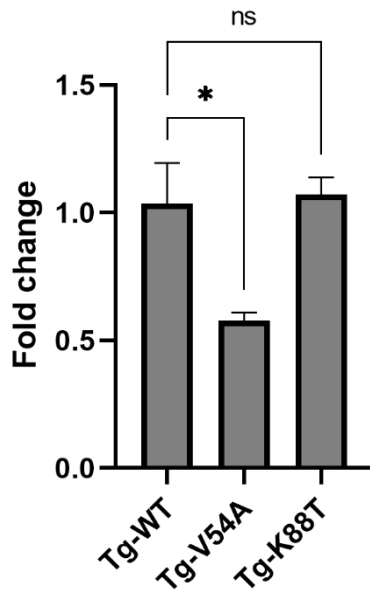

**Supplementary Figure 4: Swim analysis after heat plus caffeine exposure.** Tg-fish (**a**) and RNA-injected fish (**b**) were assessed at normal temperature (28.5°C) and after exposure to heat plus 1 mM caffeine (34°C & caffeine). The means of independent replicates were normalized to the means of control from the same day and experiment. Five independent replicates were analyzed statistically by one-way ANOVA followed by Dunnett's multiple comparisons test. Error bars represent mean  $\pm$  SEM. Differences were considered to be statistically significant at  $P < 0.05$  (\*) or  $P < 0.01$  (\*\*). Source data are provided as a Source Data file.

**a**

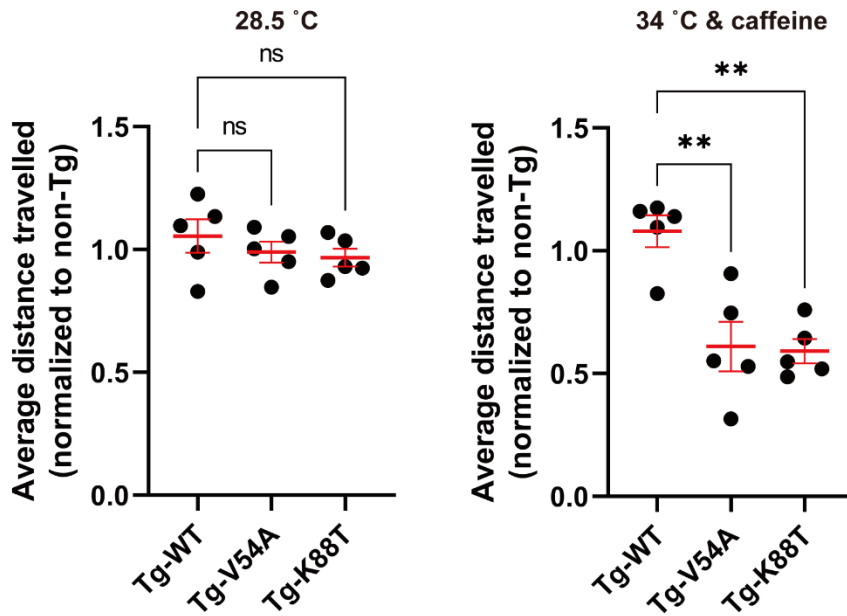

**b**

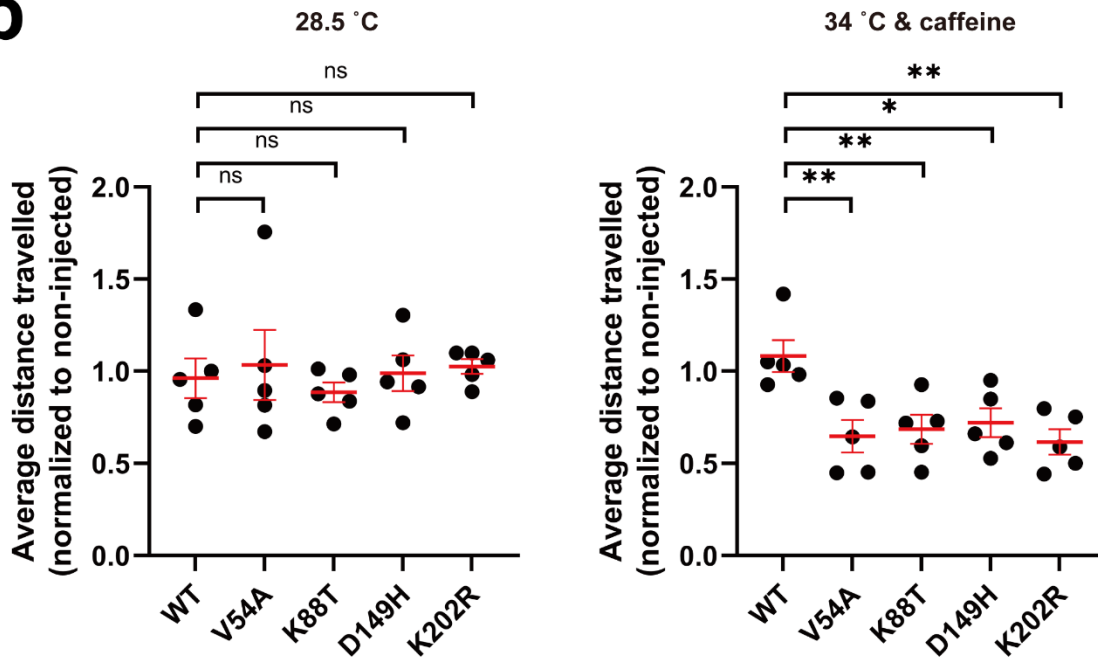



**Supplementary Figure 5: Swimming performance of non-Tg fish used for normalization in Figure 3c.**

Scatter plots display the swimming distance of 72 fish per a group (from 3 independent replicates of 24 fish) with a normalization to the mean of the group on the same day. Source data are provided as a Source Data file.

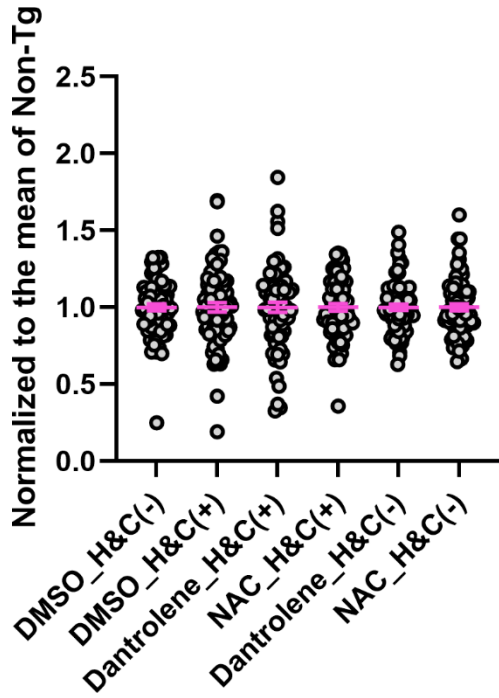

**Supplementary Figure 6: Generating disease model using C2C12 cells by CRISPR/Cas9 mutagenesis.**  
 The genomic DNA sequence of established cell lines was analyzed by Sanger methods.

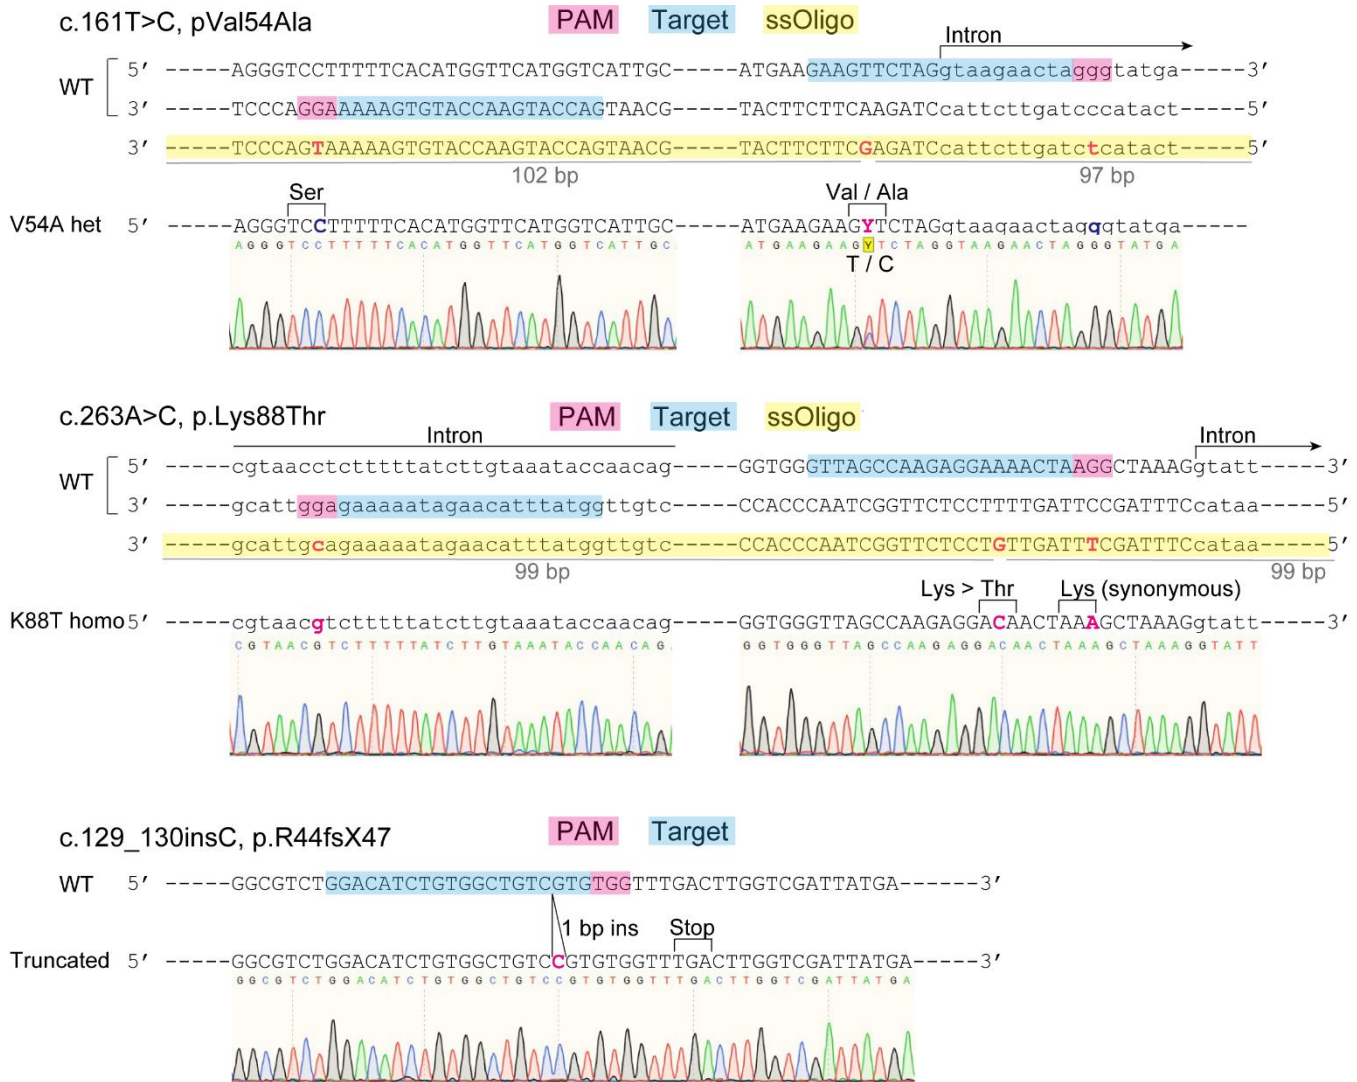

**Supplementary Figure 7: Western blotting using C2C12 myotubes.** **a**, Full images of the protein-transferred membrane. **b**, Quantifications of protein levels included three independent replicates. Junctin and Myosin were run on the same blot. Blots for Casq1 and RyR1 were processed in parallel using the samples derived from the same experiment. For normalization of RYR1 expression levels, we used the total protein data from the blots for junctin since blots for RyR1 detected only the larger proteins and did not reflect the full total amount of proteins in the samples. Data were analyzed statistically by one-way ANOVA followed by Dunnett's multiple comparisons test. Error bars represent mean  $\pm$  SEM. Differences were considered to be statistically significant at  $P < 0.05$  (\*),  $P < 0.01$  (\*\*),  $P < 0.001$  (\*\*\*) or  $P < 0.0001$  (\*\*\*\*). Source data are provided as a Source Data file.

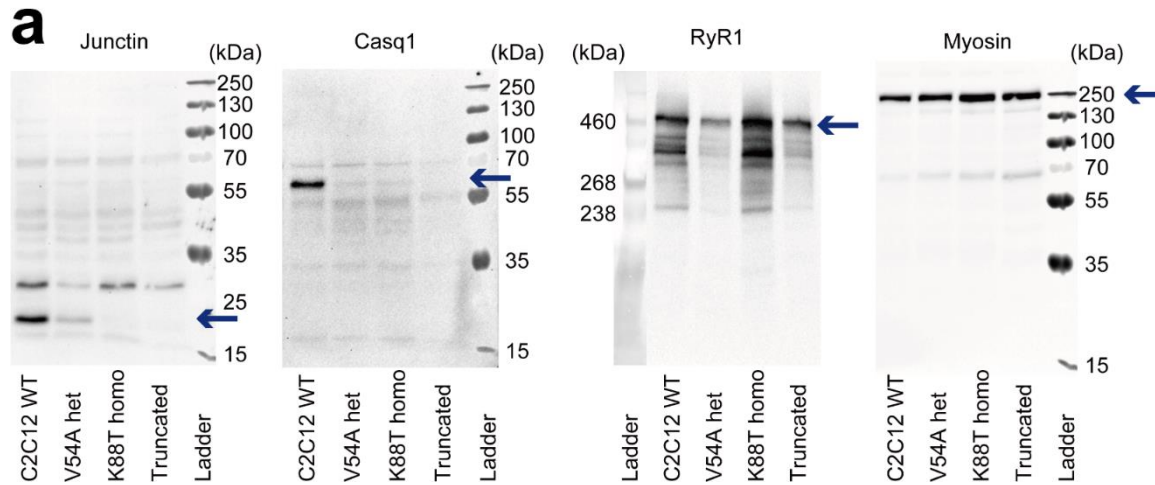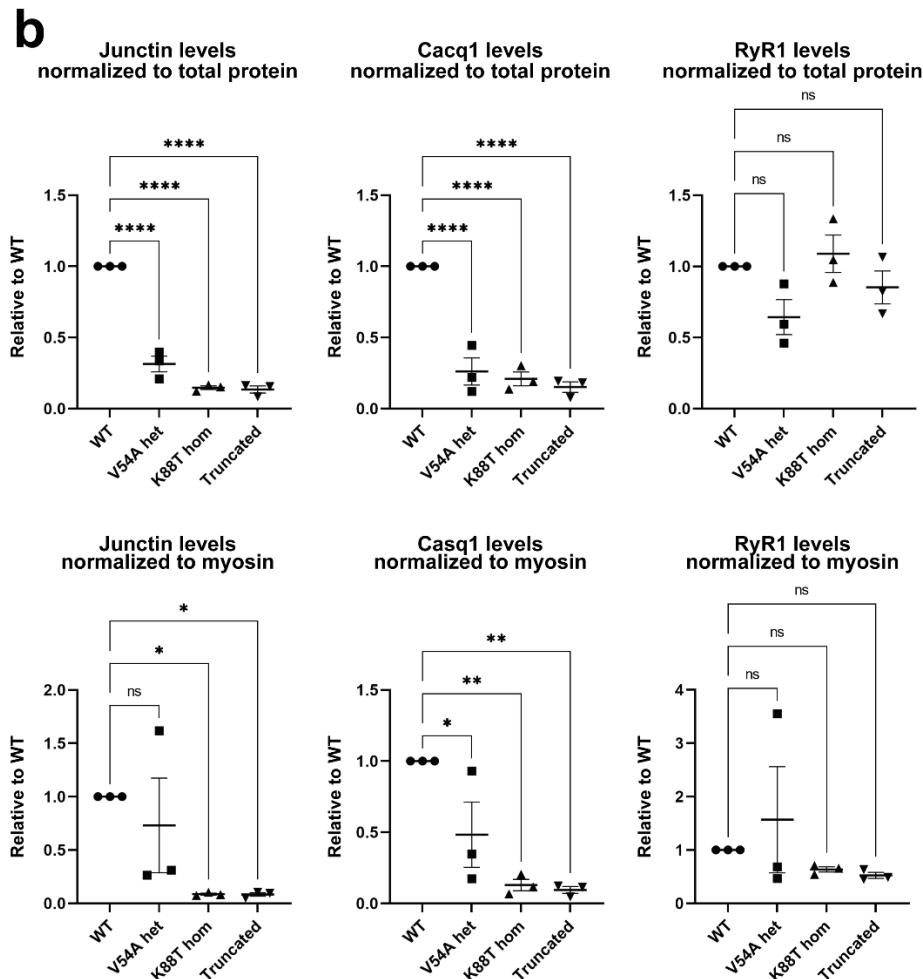

**Supplementary Figure 8: DCFDA assay in C2C12.** ROS in 6-day myotubes was measured at stable temperature (25°C or 37°C) with treatment (1 mM caffeine or 50 µM 4CmC) for 30 min. Statistical analysis of three independent replicates by two-way ANOVA followed by Dunnett's multiple comparisons test. All data are represented as mean ± SEM. Differences were considered to be statistically significant at  $P < 0.05$  (\*),  $P < 0.01$  (\*\*),  $P < 0.001$  (\*\*\*) or  $P < 0.0001$  (\*\*\*\*). Source data are provided as a Source Data file.

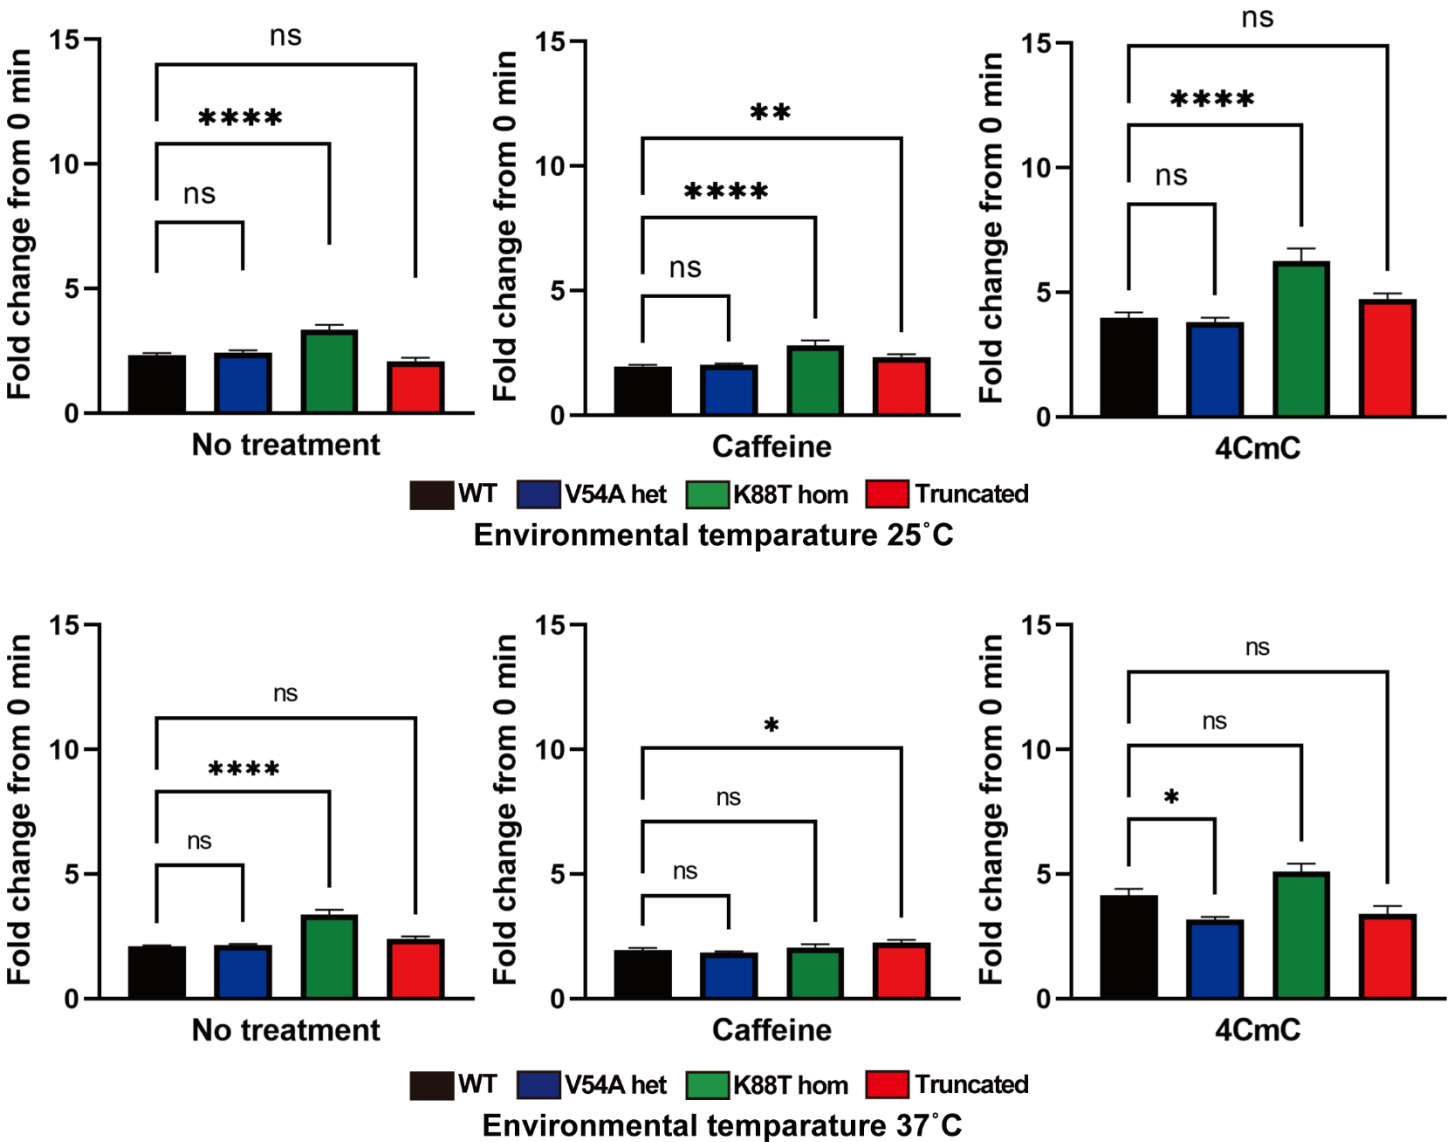

**Supplementary Figure 9: ProHits-viz dotplot of AP- Dot plot of interacting partners of junctin based on AP-MS data.** 20 proteins were considered high-confidence protein interactors to the bait (mCherry-junctin). Interestingly, most of the proteins listed in the top 10 are SERCA isoforms (sarco/endoplasmic reticulum Ca<sup>2+</sup>-ATPase) (\*) or mitochondrial proteins (\*\*).

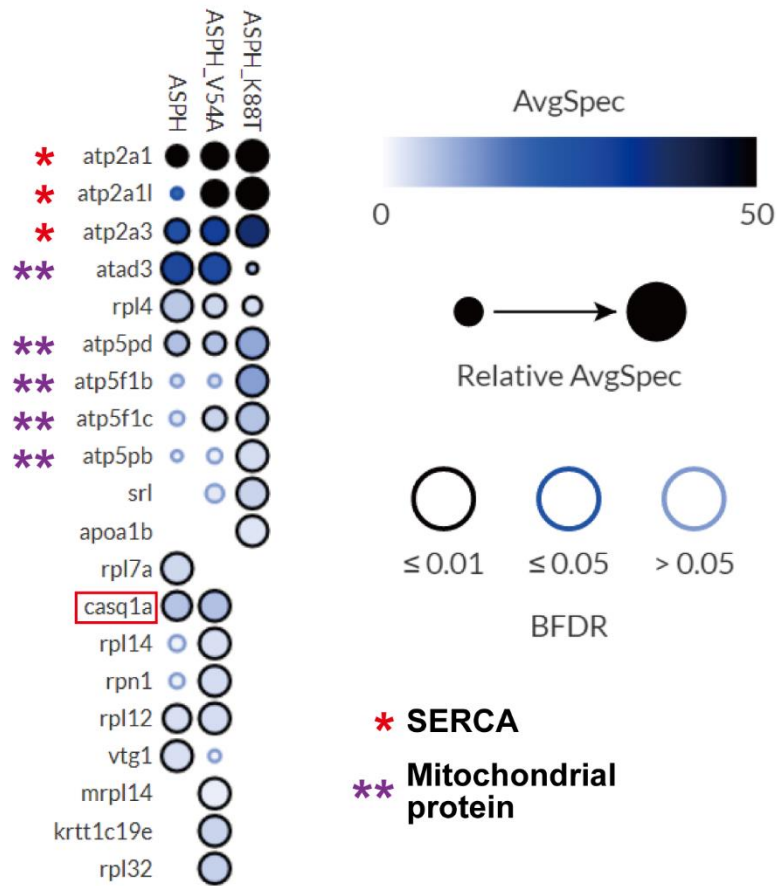

**Supplementary Figure 10: SAINT Analysis outputs.** SAINT analysis data of the top 10 protein interactors listed in Supplementary Figure 8. The SAINT analysis tool is used to identify high-confidence protein interactors versus control samples. Prior to applying SAINT, proteins were filtered based on iProphet  $\geq 0.95$  and unique peptides  $\geq 2$ . iProphet cut-off is to ensure high probability of MS2 fragmentation pattern being correctly assigned to both peptide and protein. Unique peptides cut-off is to ensure we are actually seeing the protein in question. Proteins with a BFDR (Bayesian False Discovery Rate)  $\leq 0.01$  are considered high-confidence protein interactors. Source data are provided as a Source Data file.

| Bait      | Prey           | PreyGene | Spec    | ctrlCounts | AvgP | MaxP | TopoAvgP | TopoMaxP | SaintScore | logOddsScore | FoldChange | BFDR |
|-----------|----------------|----------|---------|------------|------|------|----------|----------|------------|--------------|------------|------|
| ASPH_K88T | NP_991266.1    | atad3    | 10 5    | 0 0        | 1    | 1    | 1        | 1        | 1          | 8.15         | 75         | 0    |
| ASPH      | NP_991266.1    | atad3    | 21 37   | 0 0        | 1    | 1    | 1        | 1        | 1          | 32.55        | 290        | 0    |
| ASPH_V54A | NP_991266.1    | atad3    | 32 24   | 0 0        | 1    | 1    | 1        | 1        | 1          | 36.95        | 280        | 0    |
| ASPH_K88T | NP_001007030.1 | atp2a1   | 113 133 | 26 24      | 1    | 1    | 1        | 1        | 1          | 55.71        | 4.92       | 0    |
| ASPH      | NP_001007030.1 | atp2a1   | 70 102  | 26 24      | 1    | 1    | 1        | 1        | 1          | 6.83         | 3.44       | 0    |
| ASPH_V54A | NP_001007030.1 | atp2a1   | 96 113  | 26 24      | 1    | 1    | 1        | 1        | 1          | 37.23        | 4.18       | 0    |
| ASPH_K88T | NP_001071001.1 | atp2a1l  | 66 81   | 0 0        | 1    | 1    | 1        | 1        | 1          | 97.34        | 735        | 0    |
| ASPH      | NP_001071001.1 | atp2a1l  | 38 0    | 0 0        | 0.5  | 1    | 0.5      | 1        | 0.5        | -1.66        | 190        | 0.03 |
| ASPH_V54A | NP_001071001.1 | atp2a1l  | 54 65   | 0 0        | 1    | 1    | 1        | 1        | 1          | 80.21        | 595        | 0    |
| ASPH_K88T | XP_697108.5    | atp2a3   | 35 38   | 0 0        | 1    | 1    | 1        | 1        | 1          | 52.93        | 365        | 0    |
| ASPH      | XP_697108.5    | atp2a3   | 22 31   | 0 0        | 1    | 1    | 1        | 1        | 1          | 34.02        | 265        | 0    |
| ASPH_V54A | XP_697108.5    | atp2a3   | 28 34   | 0 0        | 1    | 1    | 1        | 1        | 1          | 42.78        | 310        | 0    |
| ASPH_K88T | NP_001019600.2 | atp5f1b  | 10 13   | 0 0        | 1    | 1    | 1        | 1        | 1          | 16.08        | 115        | 0    |
| ASPH      | NP_001019600.2 | atp5f1b  | 0 7     | 0 0        | 0.5  | 1    | 0.5      | 1        | 0.5        | -1.66        | 35         | 0.15 |
| ASPH_V54A | NP_001019600.2 | atp5f1b  | 0 7     | 0 0        | 0.5  | 1    | 0.5      | 1        | 0.5        | -1.66        | 35         | 0.15 |
| ASPH_K88T | NP_956335.1    | atp5f1c  | 9 5     | 0 0        | 1    | 1    | 1        | 1        | 1          | 8.15         | 70         | 0    |
| ASPH      | NP_956335.1    | atp5f1c  | 0 5     | 0 0        | 0.5  | 1    | 0.5      | 1        | 0.5        | -1.66        | 25         | 0.17 |
| ASPH_V54A | NP_956335.1    | atp5f1c  | 5 5     | 0 0        | 1    | 1    | 1        | 1        | 1          | 8.15         | 50         | 0    |
| ASPH_K88T | NP_001005960.1 | atp5pb   | 6 2     | 0 0        | 0.97 | 1    | 0.97     | 1        | 0.97       | 2.88         | 40         | 0    |
| ASPH      | NP_001005960.1 | atp5pb   | 0 2     | 0 0        | 0.47 | 0.95 | 0.47     | 0.95     | 0.47       | -1.66        | 10         | 0.28 |
| ASPH_V54A | NP_001005960.1 | atp5pb   | 0 3     | 0 0        | 0.5  | 0.99 | 0.5      | 0.99     | 0.5        | -1.66        | 15         | 0.23 |
| ASPH_K88T | NP_956996.1    | atp5pd   | 12 9    | 0 0        | 1    | 1    | 1        | 1        | 1          | 14.53        | 105        | 0    |
| ASPH      | NP_956996.1    | atp5pd   | 8 7     | 0 0        | 1    | 1    | 1        | 1        | 1          | 11.39        | 75         | 0    |
| ASPH_V54A | NP_956996.1    | atp5pd   | 4 10    | 0 0        | 1    | 1    | 1        | 1        | 1          | 6.47         | 70         | 0    |
| ASPH      | NP_001003620.2 | casq1a   | 5 9     | 0 0        | 1    | 1    | 1        | 1        | 1          | 8.15         | 70         | 0    |
| ASPH_V54A | NP_001003620.2 | casq1a   | 9 6     | 0 0        | 1    | 1    | 1        | 1        | 1          | 9.78         | 75         | 0    |
| ASPH_K88T | NP_998272.1    | rpl4     | 4 3     | 0 0        | 0.99 | 1    | 0.99     | 1        | 0.99       | 4.72         | 35         | 0    |
| ASPH      | NP_998272.1    | rpl4     | 5 8     | 0 0        | 1    | 1    | 1        | 1        | 1          | 8.15         | 65         | 0    |
| ASPH_V54A | NP_998272.1    | rpl4     | 3 6     | 0 0        | 1    | 1    | 1        | 1        | 1          | 4.72         | 45         | 0    |
| ASPH_K88T | NP_001070999.1 | srl      | 5 5     | 0 0        | 1    | 1    | 1        | 1        | 1          | 8.15         | 50         | 0    |
| ASPH_V54A | NP_001070999.1 | srl      | 0 5     | 0 0        | 0.5  | 1    | 0.5      | 1        | 0.5        | -1.66        | 25         | 0.17 |
